# Supplementary material
Source: PubMed Central journal article supplement (PMC5957536)
Supplement: NIHMS966209-supplement-SI.pdf [file NIHMS966209-supplement-SI.pdf]

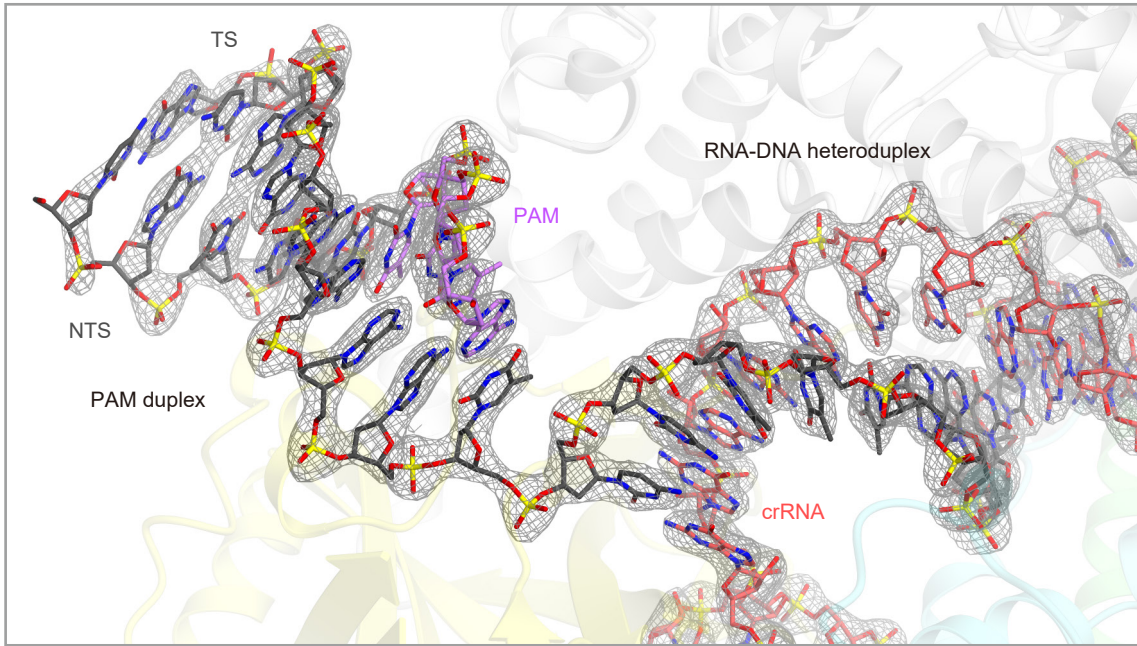

**Figure S1. Electron Density Map, Related to Figure 2**

The  $2mF_o - DF_o$  electron density map for the nucleic acid molecules (contoured at  $2\sigma$ ).

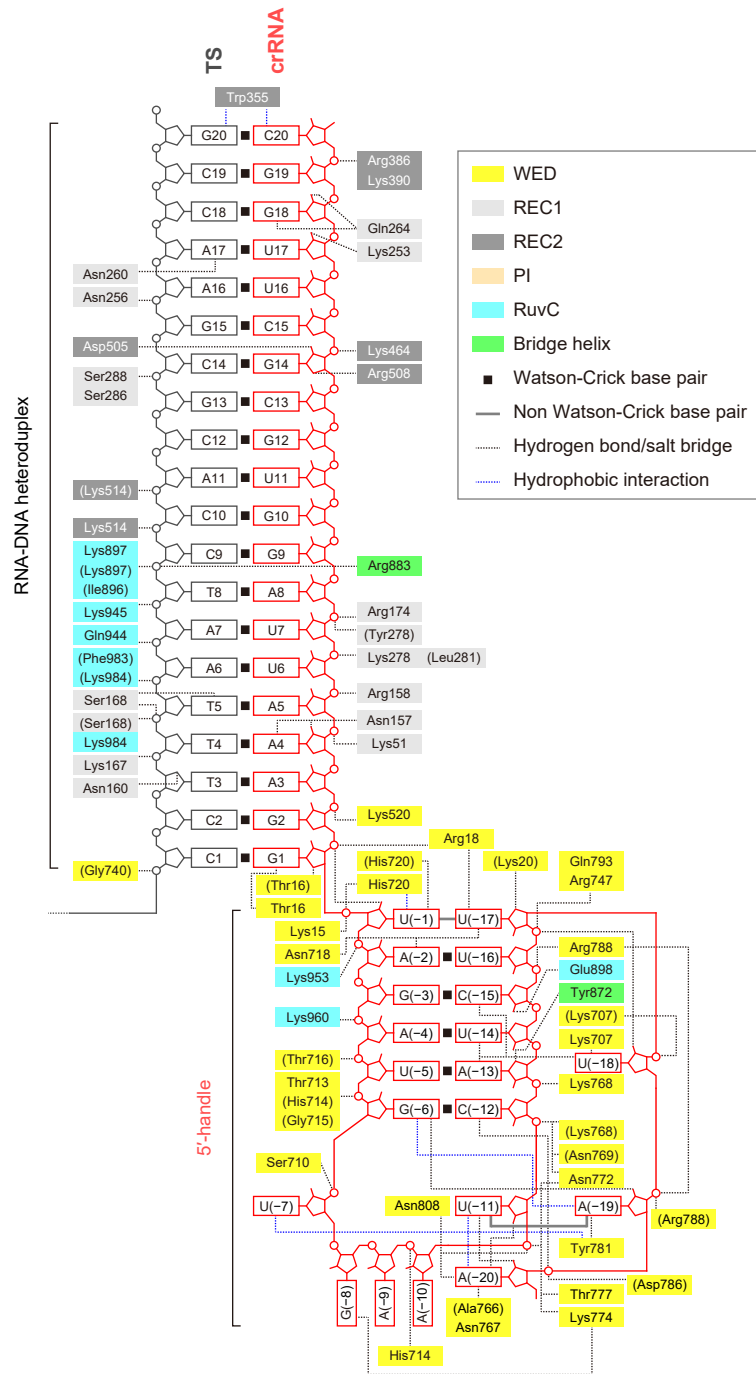

**Figure S2. Schematic of the Nucleic Acid Recognition by LbCpf1, Related to Figure 2**

Residues that interact with the crRNA and the target DNA via their main chain are shown in parentheses. Water-mediated hydrogen-bonding interactions are omitted for clarity.

**A** LbCpf1-crRNA-DNA  
LbCpf1-crRNA

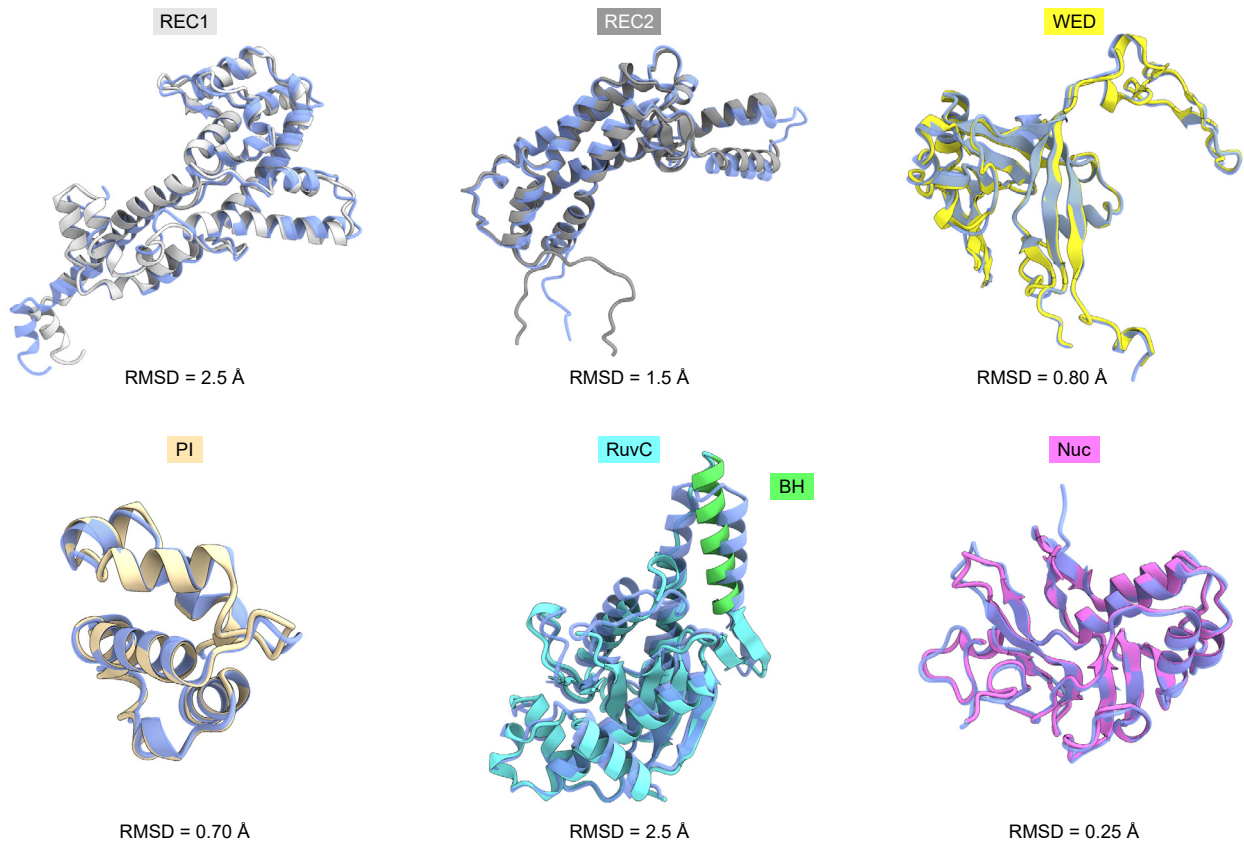

**B** LbCpf1-crRNA-DNA  
LbCpf1-crRNA

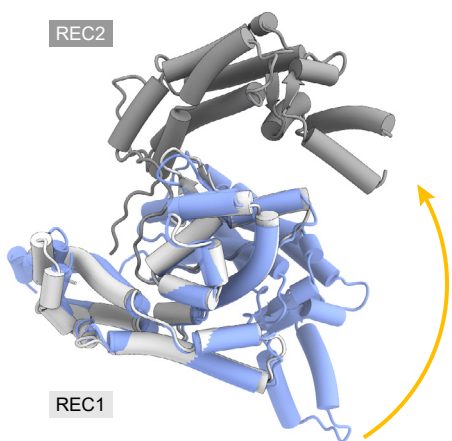

**C** LbCpf1-crRNA-DNA  
LbCpf1-crRNA

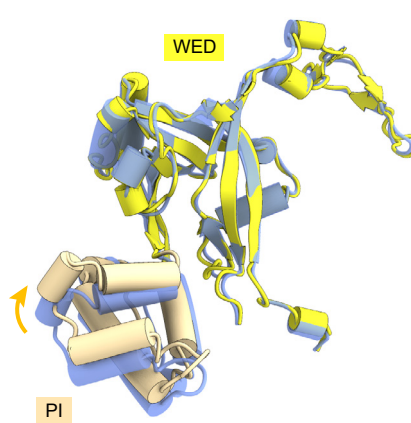

**D** LbCpf1-crRNA-DNA  
LbCpf1-crRNA

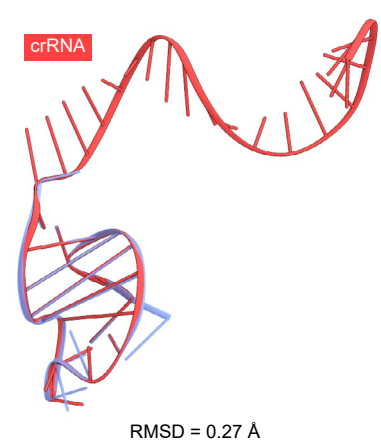

**Figure S3. Structural Comparison between the Binary and Ternary Complexes of LbCpf1, Related to Figure 3**

(A) Superimposition of the individual domains in the binary (PDB: 5ID6) (Dong et al., 2016) (blue) and ternary (colored) complexes of LbCpf1. The RMSD values for equivalent C $\alpha$  atoms are shown below the structures.  
 (B and C) Superimposition of the REC1-REC2 (B) and WED-PI (C) domains in the binary (blue) and ternary (colored) complexes of LbCpf1, based on their REC1 and WED domains, respectively. Structural changes are indicated by orange arrows.  
 (D) Superimposition of the crRNA in the binary (blue) and ternary (colored) complexes of LbCpf1. The RMSD value for equivalent phosphorus atoms is shown below the structure.

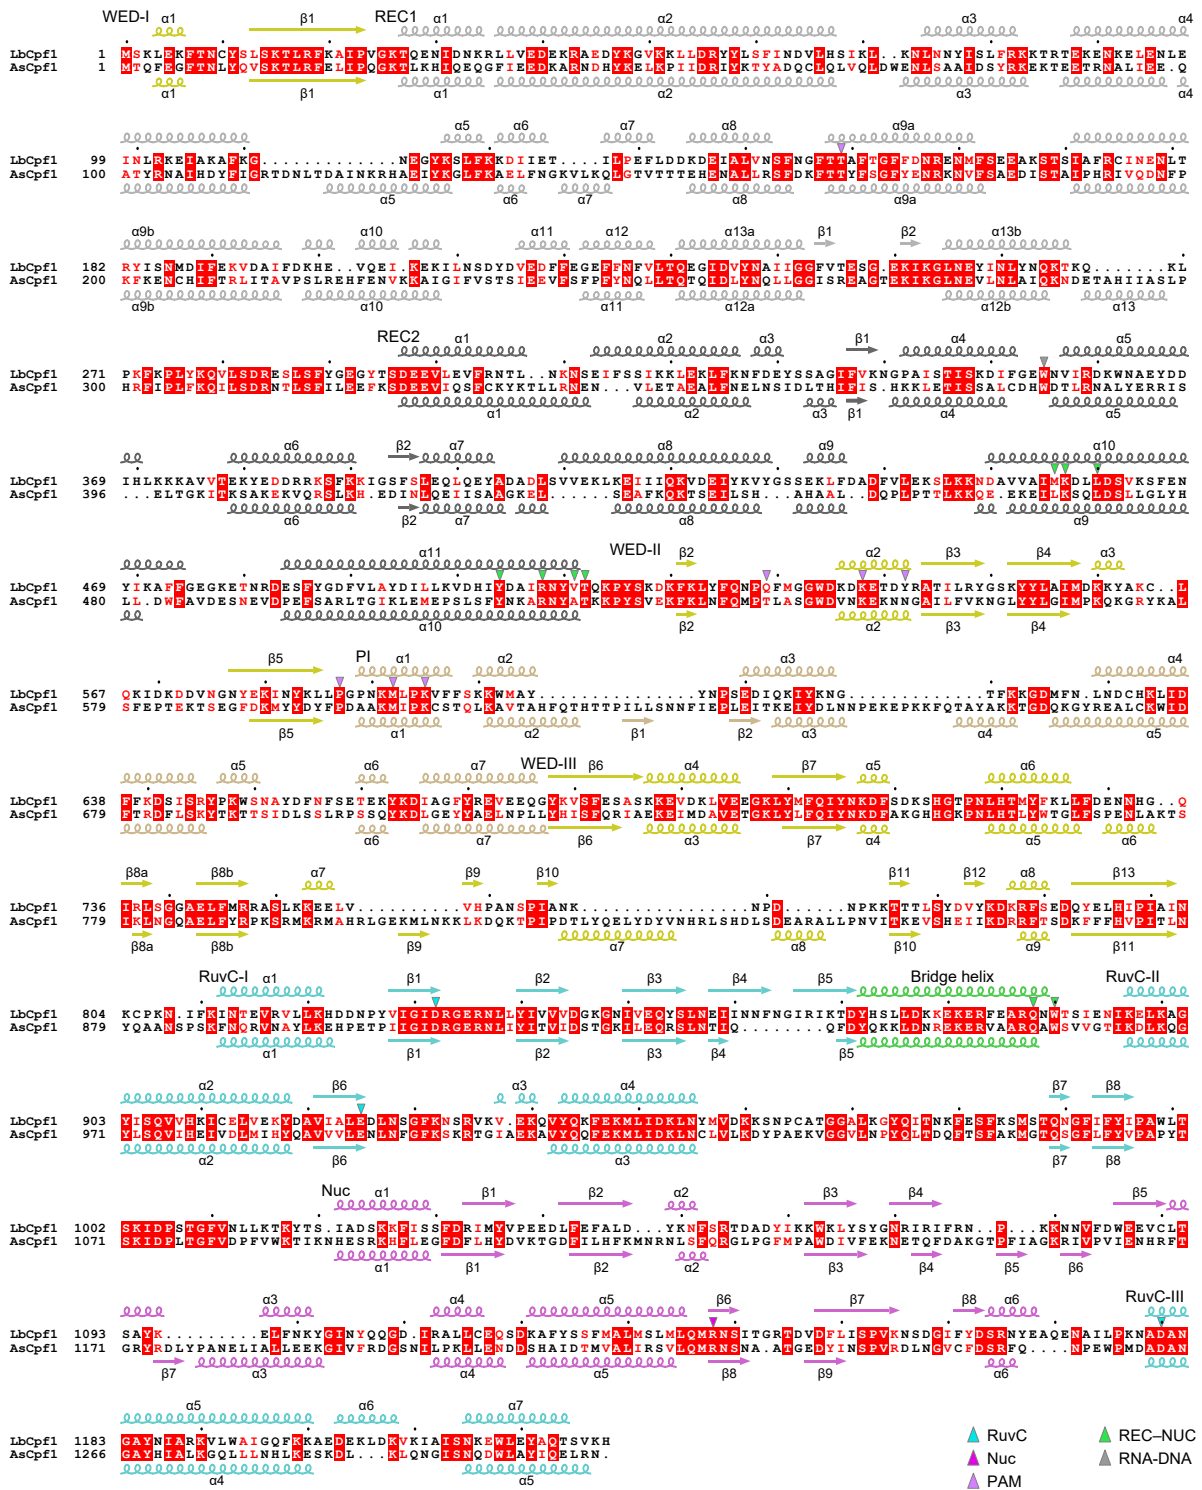

Figure S4. Sequence Alignment of LbCpf1 and AsCpf1, Related to Figure 4

Key residues are indicated by triangles. The figure was prepared using Clustal Omega (<http://www.ebi.ac.uk/Tools/msa/clustalo>) and ESPript (<http://esprict.ibcp.fr/ESPript/ESPript>). As, *Acidaminococcus sp. BV3L6*; Lb, *Lachnospiraceae bacterium ND2006*.

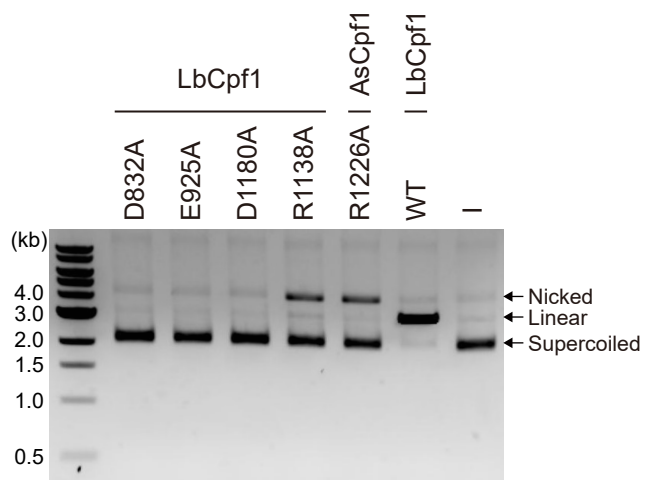

**Figure S5. Mutational Analysis of the Nuclease Domains, Related to Figure 4**

*In vitro* cleavage activities of the wild-type or mutants of Cpf1 proteins. The Cpf1-crRNA complex (100 nM) was incubated at 37°C for 20 min with a circular plasmid target with the TTTA PAM.

**A** LbCpf1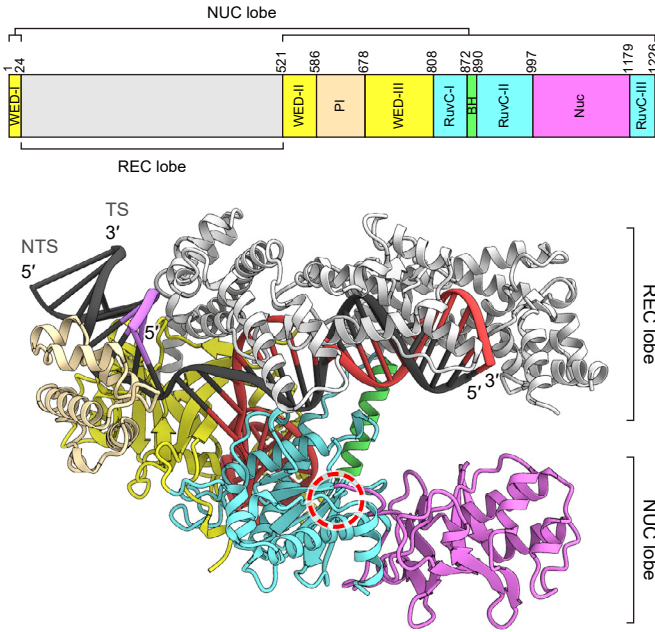**B** AaC2c1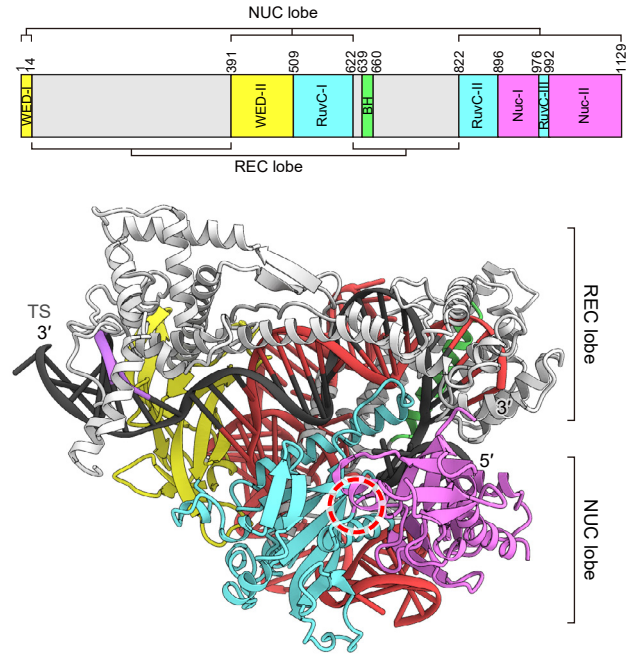**C**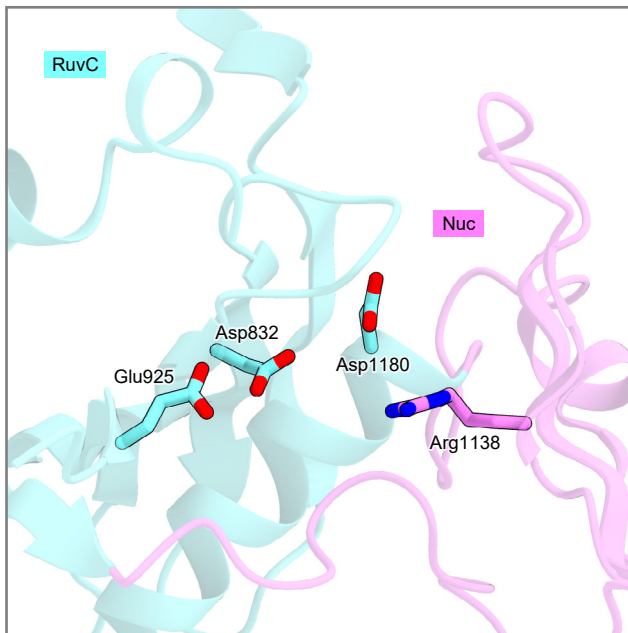**D**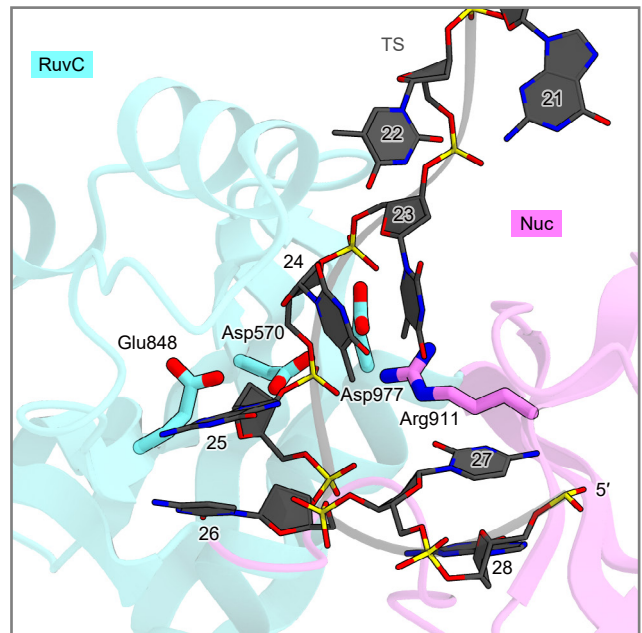**Figure S6. Structural Comparison between LbCpf1 and AaC2c1, Related to Figure 4**

(A and B) Overall structures of LbCpf1 (A) and AaC2c1 (PDB: 5U30) (Yang et al., 2016) (B). The RuvC active sites are indicated by red circles.

(C and D) Active sites of LbCpf1 (C) and AaC2c1 (D). In (D), the side chains of Asp570, Glu848 and Asp977 in AaC2c1 are modeled, since these residues were mutated to alanine for crystallization.

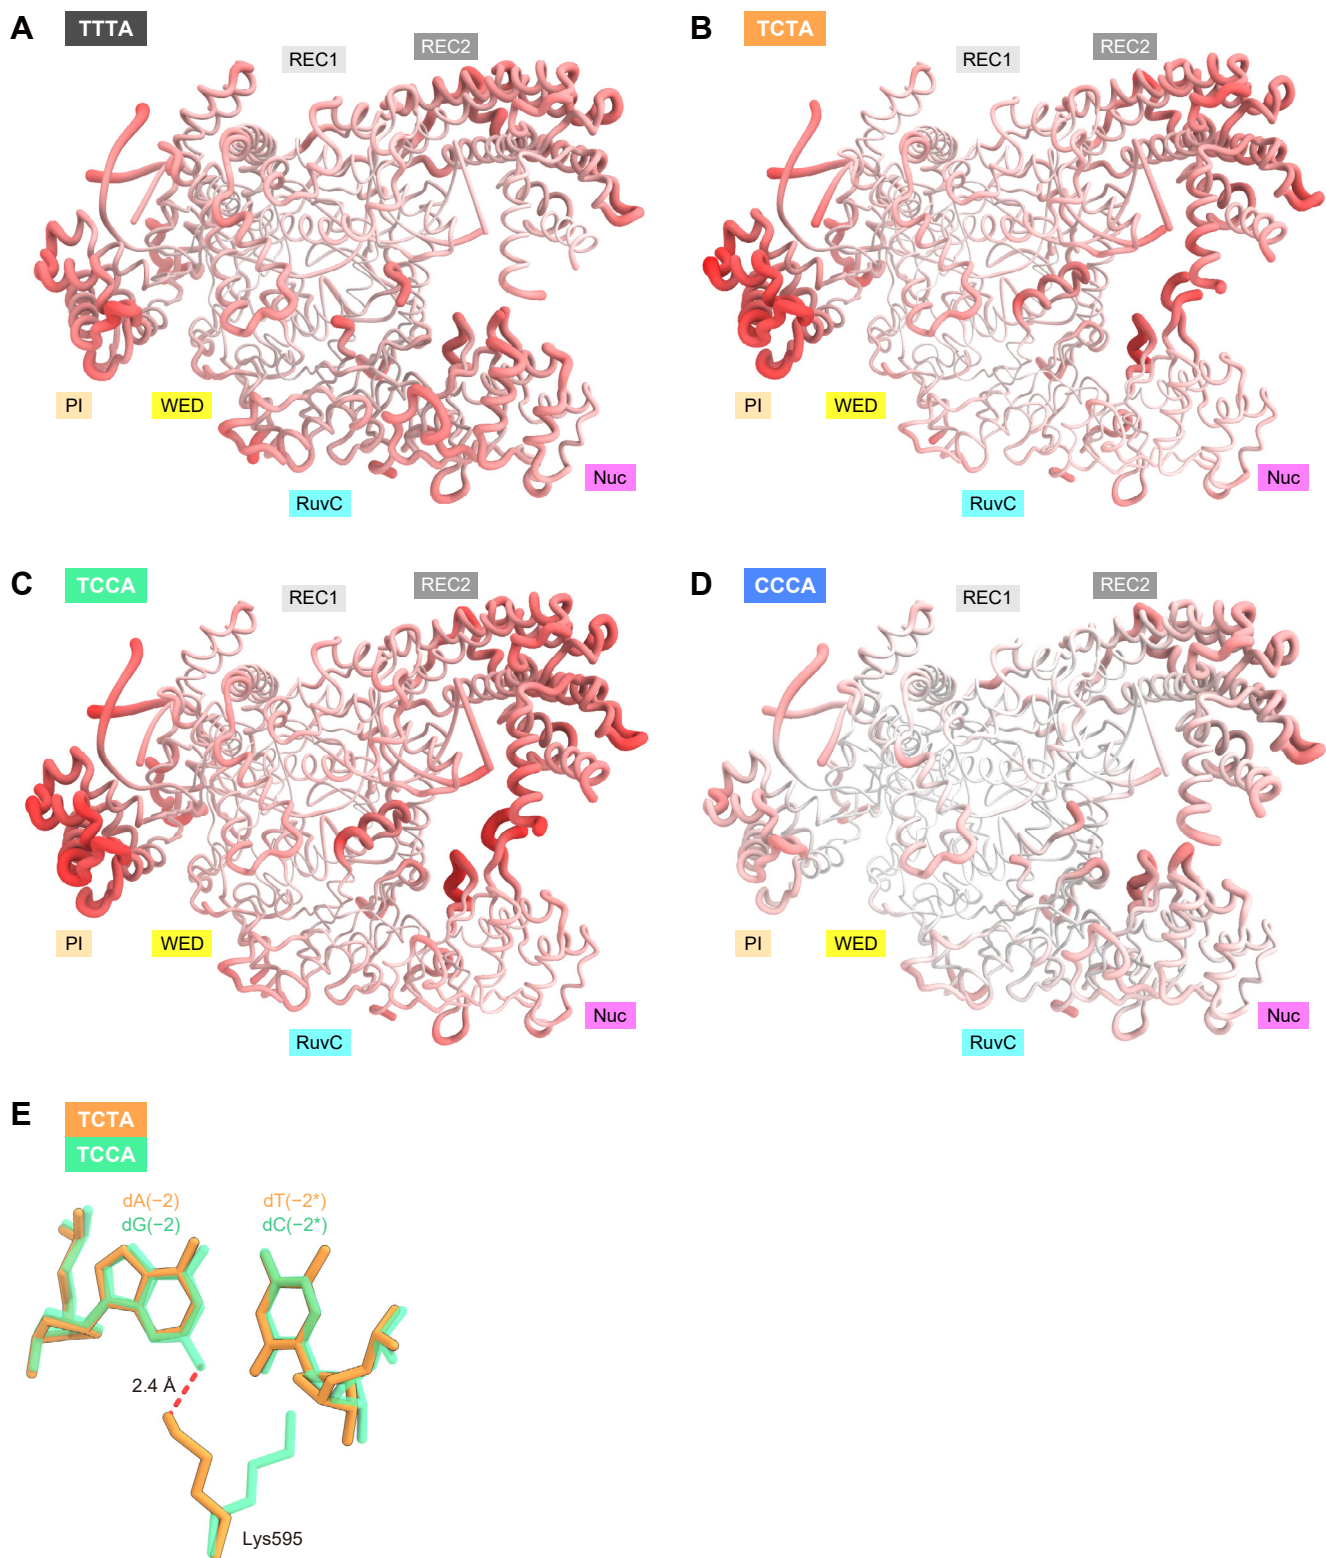

**Figure S7. Flexibility of the PI Domain, Related to Figures 6 and 7**

(A–D) *B*-factor distributions of the TTTA (A), TCTA (B), TCCA (C) and CCCA (D) complexes. The *B*-factor values are colored from white (40 Å<sup>2</sup>) to red (200 Å<sup>2</sup>). Note that the CCCA complex exhibits lower *B*-factor values, due to the different crystal packing interactions.

(E) Superimposition of the TCTA (orange) and TCCA (green) complexes.

**Table S1. Oligonucleotides, Related to STAR Methods**

| Oligonucleotides used to generate the LbCpf1 expression vector (pE-SUMO-LbCpf1, with the TEV recognition site between His <sub>6</sub> -SUMO and LbCpf1) |                                              |                                        |
|----------------------------------------------------------------------------------------------------------------------------------------------------------|----------------------------------------------|----------------------------------------|
| PCR template                                                                                                                                             | Forward primer                               | Reverse primer                         |
| pcDNA3.1-LbCpf1                                                                                                                                          | CCCGGGGCATATGAGCAAGCTGGAGAAGTTTACAAAC        | GGGGCTCGAGTTAGTGCTTCACGCTGGTCTGGGCGTAC |
| Oligonucleotides used to introduce the Cpf1 mutations (pE-SUMO-LbCpf1 or pE-SUMO-AsCpf1)                                                                 |                                              |                                        |
| Mutation                                                                                                                                                 | Forward primer                               | Reverse primer                         |
| LbCpf1-D832A                                                                                                                                             | GCTAGGGGCGAGCGCAATCTGCTGTATA                 | GATGCCGATCACATAGGGGTTATCG              |
| LbCpf1-E925A                                                                                                                                             | GCGGACCTGAACTCTGGCTTTAAGAATA                 | CAGGGCGATCACGGCATCGTACTTC              |
| LbCpf1-D1180A                                                                                                                                            | GCCGCCAATGGCGCTATAACATCGCCA                  | GGCGTTCTTTGGCAGGATGGCATTTC             |
| LbCpf1-R1138A                                                                                                                                            | GCTAACAGCATCACAGGCCGC                        | CATCTGCAGCATCAGGCTCATCAG               |
| AsCpf1-R1226A                                                                                                                                            | GCTAACTCCAATGCCGCCACA                        | CATCTGCAGCACGCTGCGGATCAG               |
| DNA oligonucleotides used for crystallization                                                                                                            |                                              |                                        |
| PAM                                                                                                                                                      | Target DNA strand                            | Non-target DNA strand                  |
| TTTA                                                                                                                                                     | GCCAAGCGCACCTAATTTCTAAAGGACG                 | CGTCCTTTA                              |
| TCTA                                                                                                                                                     | GCCAAGCGCACCTAATTTCTAGAGGACG                 | CGTCCTCTA                              |
| TCCA                                                                                                                                                     | GCCAAGCGCACCTAATTTCTGGAGGACG                 | CGTCCTCCA                              |
| CCCA                                                                                                                                                     | GCCAAGCGCACCTAATTTCTGGGGGACG                 | CGTCCCCCA                              |
| crRNA used for crystallization                                                                                                                           |                                              |                                        |
| LbCpf1 crRNA 20                                                                                                                                          | AAUUUCUACUAAGUGUAGAUGGAAAUUAGGUGCGCUUGGC     |                                        |
| crRNA used for cleavage assays                                                                                                                           |                                              |                                        |
| LbCpf1 crRNA 24                                                                                                                                          | AAUUUCUACUAAGUGUAGAUGGAAAUUAGGUGCGCUUGGCAACC |                                        |
| AsCpf1 crRNA 24                                                                                                                                          | AAUUUCUACUCUUGUAGAUGGAAAUUAGGUGCGCUUGGCAACC  |                                        |
| Oligonucleotides used to introduce the PAM sequences into the target plasmids (pUC119)                                                                   |                                              |                                        |
| Mutation                                                                                                                                                 | Forward primer                               | Reverse primer                         |
| TTTA                                                                                                                                                     | TTTAGGAAATTAGGTGCGCTTGGAACC                  | GTATTTAGAAAAATAAACAATAGGG              |
| CTTA                                                                                                                                                     | CTTAGGAAATTAGGTGCGCTTGGAACC                  |                                        |
| TCTA                                                                                                                                                     | TCTAGGAAATTAGGTGCGCTTGGAACC                  |                                        |
| TTCA                                                                                                                                                     | TTCAGGAAATTAGGTGCGCTTGGAACC                  |                                        |
| CCTA                                                                                                                                                     | CCTAGGAAATTAGGTGCGCTTGGAACC                  |                                        |
| TCCA                                                                                                                                                     | TCCAGGAAATTAGGTGCGCTTGGAACC                  |                                        |
| CCCA                                                                                                                                                     | CCCAGGAAATTAGGTGCGCTTGGAACC                  |                                        |
| Oligonucleotides used for surveyor assays                                                                                                                |                                              |                                        |
| Locus                                                                                                                                                    | Forward primer                               | Reverse primer                         |
| <i>DNMT1</i>                                                                                                                                             | CTGGGACTCAGGCGGGTCAC                         | CCTCACACAACAGCTTCATGTCAGC              |
| <i>EMX1</i>                                                                                                                                              | CCATCCCCTTCTGTGAATGT                         | GGAGATTGGAGACACGGAGA                   |



**Table S2. Target Sequences for the *In Vivo* Cleavage Assays, Related to STAR Methods**

| Locus        | Site | PAM  | Target sequence          |
|--------------|------|------|--------------------------|
| <i>DNMT1</i> | 1    | CTTA | GAGCAGGCGTGCTGCACACAGCA  |
|              | 2    | CTTG | AGCCTCTGGGTCTAGAACCCTCT  |
|              | 3    | CTTC | AGCTAAAATAAAGGAGGAGGAAG  |
|              | 4    | TCTG | GGTCTAGAACCCTCTGGGGACCG  |
|              | 5    | TCTC | CGTGAACGTTCCCTTAGCACTCT  |
|              | 6    | TCTG | TTACTCGCCTGTCAAGTGGCGTG  |
|              | 7    | TTCA | GTCTCCGTGAACGTTCCCTTAGC  |
|              | 8    | TTCC | CCAGAGTGACTTTTCCTTTTATT  |
|              | 9    | TTCC | CTTAGCACTCTGCCACTTATTGG  |
|              | 10   | CCTG | GGGCCGTTTCCCTCACTCCTGCT  |
|              | 11   | CCTG | CCTCAGCTGCTCACTTGAGCCTC  |
|              | 12   | CCTG | TCAAGTGGCGTGACACCGGGCGT  |
|              | 13   | TCCC | TCACTCCTGCTCGGTGAATTTGG  |
|              | 14   | TCCG | TGAACGTTCCCTTAGCACTCTGC  |
|              | 15   | TCCA | TGTCTGTTACTCGCCTGTCAAAGT |
|              | 16   | CCCA | GAGTGACTTTTCCTTTTATTTC   |
|              | 17   | CCCG | TCACCCCTGTTTCTGGCACCAGG  |
|              | 18   | CCCA | TAAGTGGCAGAGTGCTAAGGGAA  |
|              | 19   | TTTC | CCTCACTCCTGCTCGGTGAATTT  |
|              | 20   | TTTC | CTGATGGTCCATGTCTGTTACTC  |
|              | 21   | TTTC | TGGCACCCAGGAATCCCCAACATG |
| <i>EMX1</i>  | 1    | CTTG | CTGCTGGCCAGGCCCTGCGTGG   |
|              | 2    | CTTG | AAGCCCGGGGCCGCCATTGACAG  |
|              | 3    | CTTC | CGGAGGACAAAGTACAAACGGCA  |
|              | 4    | TCTC | AGCTCAGCCTGAGTGTGAGGCC   |
|              | 5    | TCTG | GGGGCCTCCTGAGTTTCTCATCT  |
|              | 6    | TCTG | TGCCCTCCCTCCCTGGCCCAGG   |
|              | 7    | TTCC | AGAACCGGAGGACAAAGTACAAA  |
|              | 8    | TTCC | TCCTCCAGCTTCTGCCGTTTGTG  |
|              | 9    | TTCG | TGGCAATGCGCCACCGTTGATG   |
|              | 10   | CCTG | AGTTTCTCATCTGTGCCCTCCC   |
|              | 11   | CCTC | CAATGACTAGGGTGGGCAACCAC  |
|              | 12   | CCTG | CGTGGGCCCAAGCTGGACTCTGG  |
|              | 13   | TCCC | TCCCTGGCCCAGGTGAAGGTGTG  |
|              | 14   | TCCA | GAACCGGAGGACAAAGTACAAAC  |
|              | 15   | TCCG | AGCAGAAGAAGAAGGGCTCCCAT  |
|              | 16   | CCCA | TCAGGCTCTCAGCTCAGCCTGAG  |
|              | 17   | CCCA | GGTGAAGGTGTGTTCCAGAACC   |
|              | 18   | CCCA | CGAGGGCAGAGTGCTGCTTGCTG  |
|              | 19   | TTTC | TCCTCCGTTTCTGGAACACACC   |
|              | 20   | TTTG | TACTTTGTCTCCGTTCTGGAA    |
|              | 21   | TTTG | TGGTTGCCACCCTAGTCATTGG   |
